# Supplementary material
Source: PubMed Central journal article supplement (PMC540068)
Supplement: nar_33_suppl-1_D675__1.pdf [file nar_33_suppl-1_D675__1.pdf]

## Supplementary Material

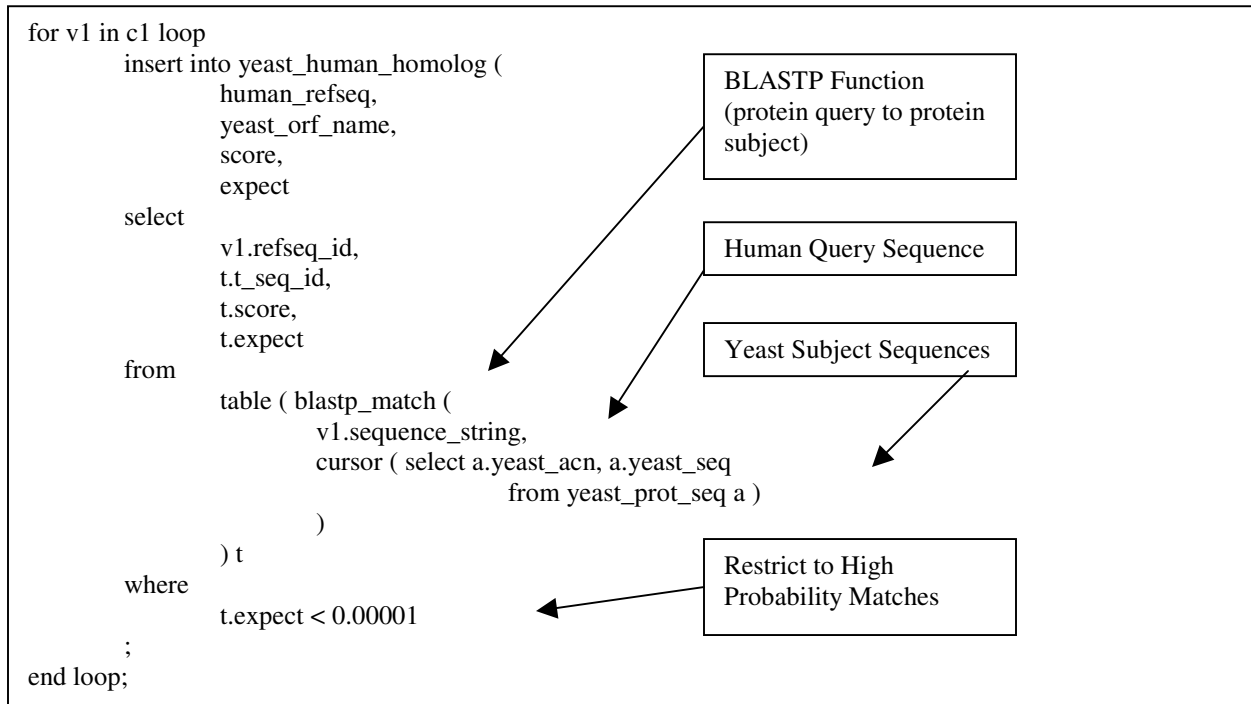

Figure 1. The PL/SQL Script for Performing the Iterative BLAST Query.

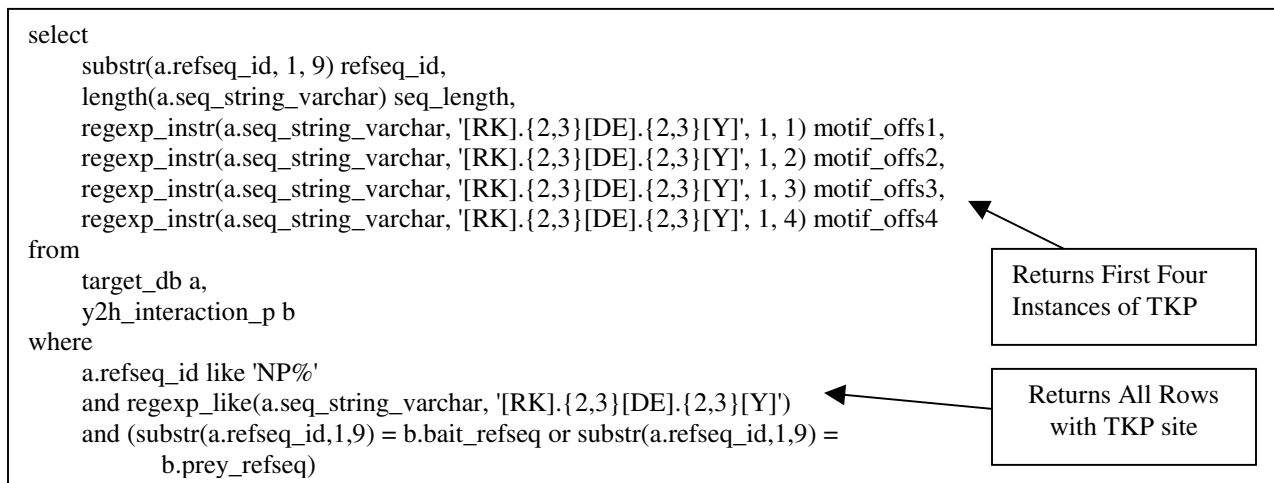

Figure 2. The SQL Statement for Identifying the Location of the First Four TKP Sites in a Protein Database.
